# Supplementary material for: Recyclable optical bioplastics platform for solid state red light harvesting via triplet–triplet annihilation photon upconversion
Source: J Mater Chem A Mater. 2022 Aug 16;10(40):21279–90. doi: 10.1039/d2ta04810h (PMC9578683; doi:10.1039/d2ta04810h)
Supplement: TA-010-D2TA04810H-s001 [file TA-010-D2TA04810H-s001.pdf]

## Supplementary Information

### Recyclable Optical Bioplastics Platform for Solid State Red Light Harvesting via Triplet-triplet Annihilation Photon Upconversion

**Pankaj Bharmoria,<sup>a</sup> Fredrik Edhborg,<sup>a</sup> Hakan Bildirir,<sup>a</sup> Yoichi Sasaki,<sup>b</sup> Shima Ghasemi,<sup>a</sup> Anders Mårtensson,<sup>a</sup> Nobuhiro Yanai,<sup>b</sup> Nobuo Kimizuka,<sup>b</sup> Bo Albinsson,<sup>a</sup> Karl Börjesson,<sup>c</sup> Kasper Moth-Poulsen<sup>\*a,d,e</sup>**

<sup>a</sup>Department of Chemistry and Chemical Engineering, Chalmers University of Technology, Kemivägen 4, 412 96, Gothenburg, Sweden.

<sup>b</sup>Department of Chemistry and Biochemistry, Graduate School of Engineering, Center for Molecular Systems (CMS), Kyushu University 744 Moto-oka, Nishi-ku, Fukuoka 819-0395, Japan

<sup>c</sup>Department of Chemistry and Molecular Biology, Kemivägen 10, 412 96, Gothenburg, Sweden

<sup>d</sup>The Institute of Materials Science of Barcelona, ICMA-B-CSIC, 08193, Bellaterra, Barcelona, Spain

<sup>e</sup>Catalan Institution for Research & Advanced Studies, ICREA, Pg. Lluís Companys 23, Barcelona, Spain

\*To whom correspondence should be addressed: E-mail: [pankajb@chalmers.se](mailto:pankajb@chalmers.se), [kasper.moth-poulsen@chalmers.se](mailto:kasper.moth-poulsen@chalmers.se)

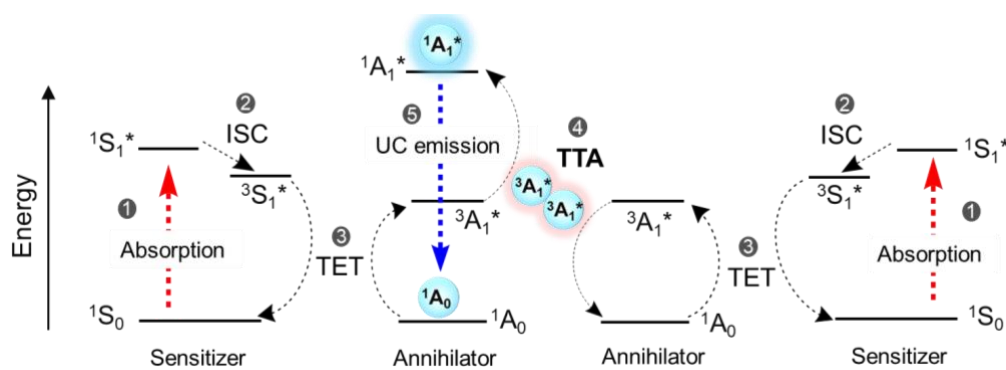

**Fig. S1.** Energy diagram of triple-triplet annihilation photon upconversion (TTA-UC).

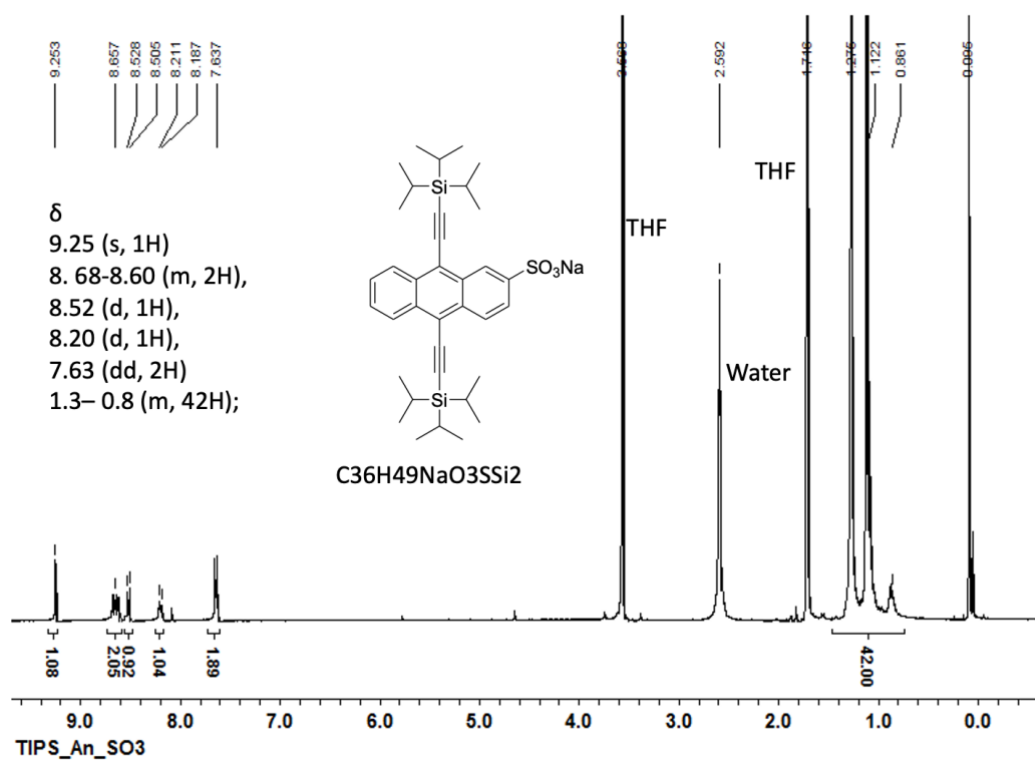

**Fig. S2.**  $^1\text{H}$ -NMR Spectra of Sodium TIPS-Anthracene Sulfonate in deuterated THF.  $^1\text{H}$  NMR (400 MHz,  $d^8$ -THF)

a

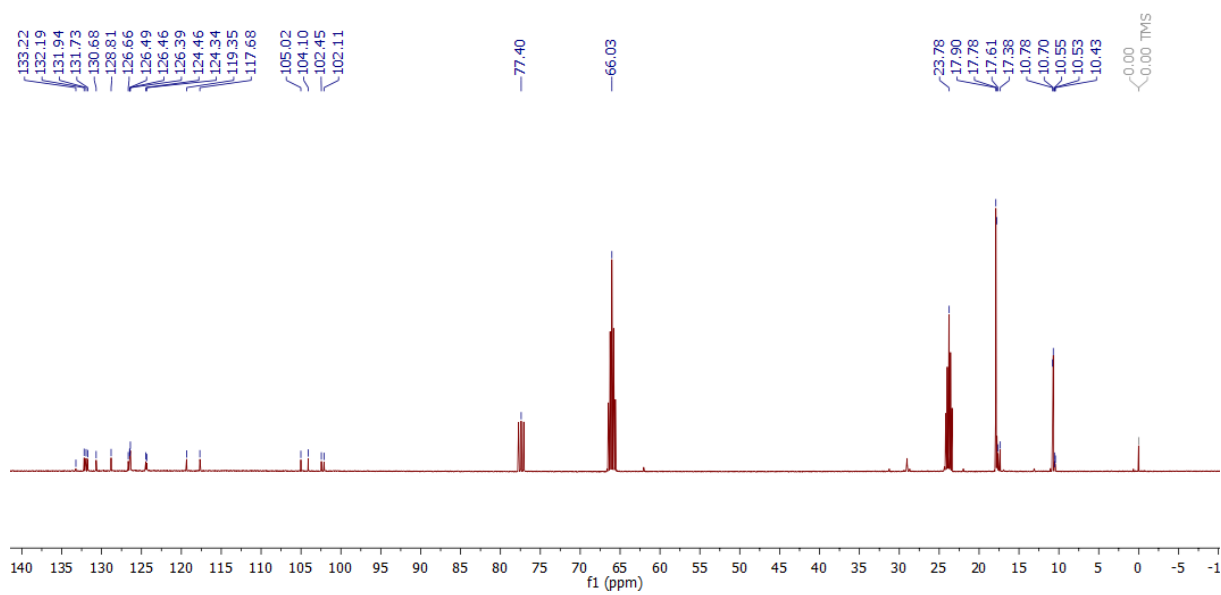

b

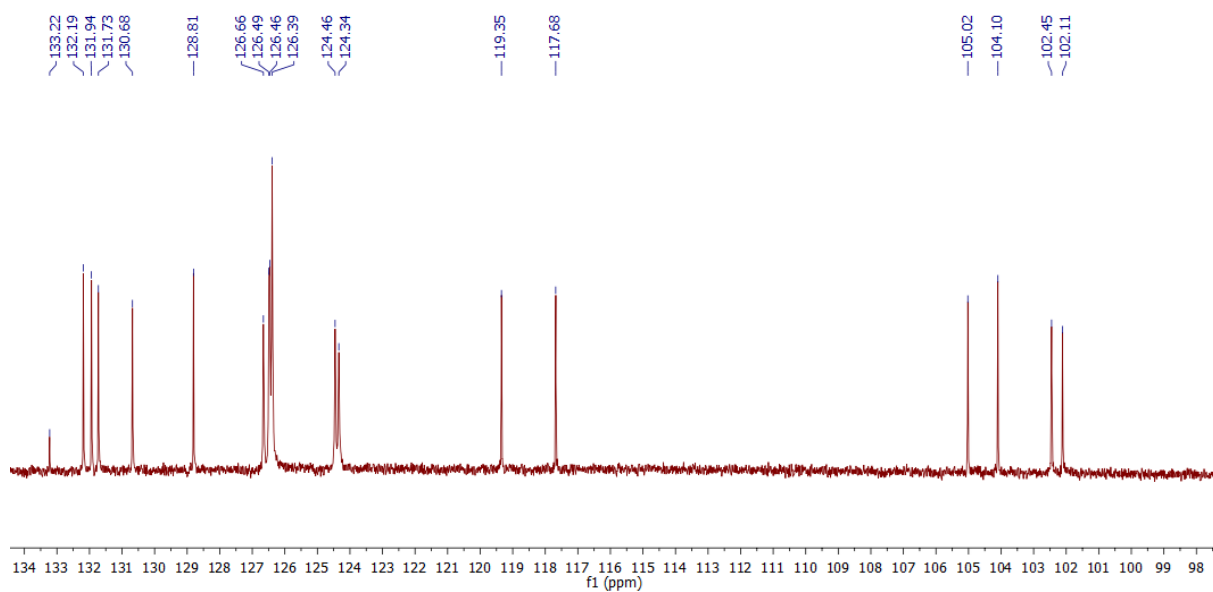

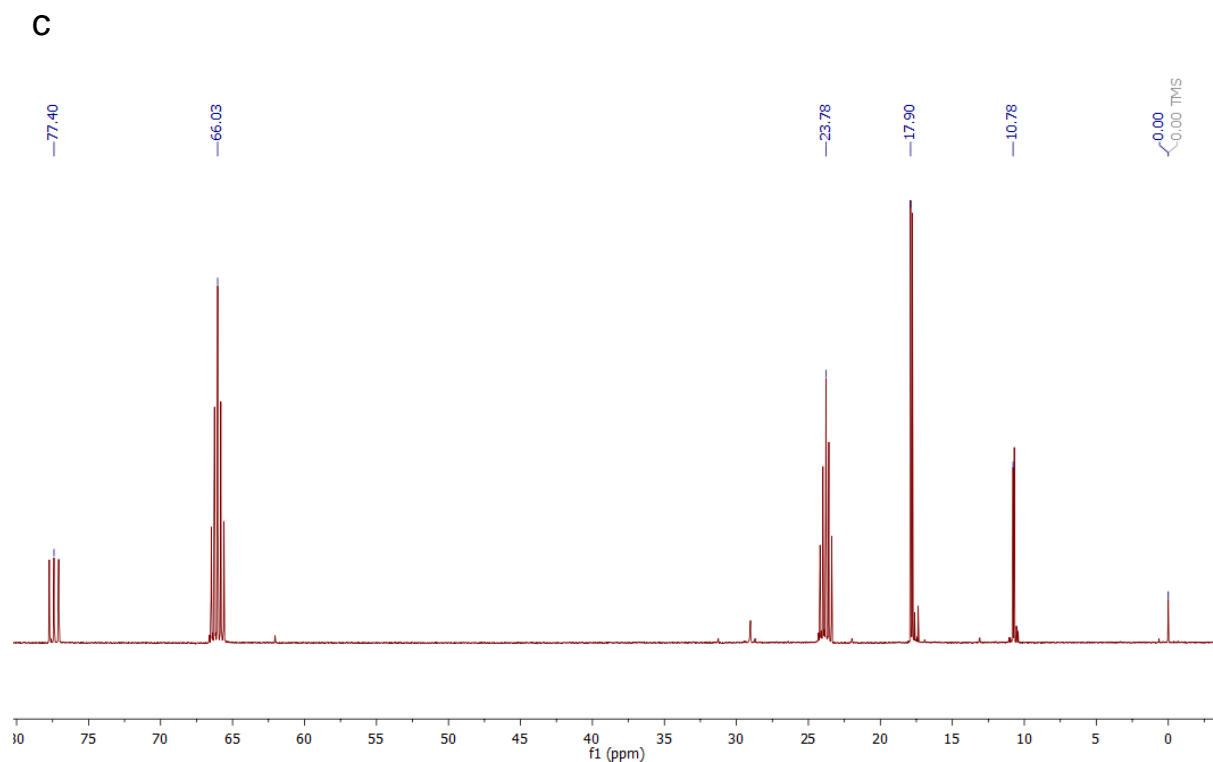

**Fig. S3.**  $^{13}\text{C}$  carbon NMR of TIPS-AnS in  $\text{CDCl}_3$  and d-THF mixture. **a)** Full spectrum **b)** sp<sup>2</sup> and sp carbons, **c)** aliphatic region (77.40 comes from chloroform and 66.03 & 23.78 are from THF).

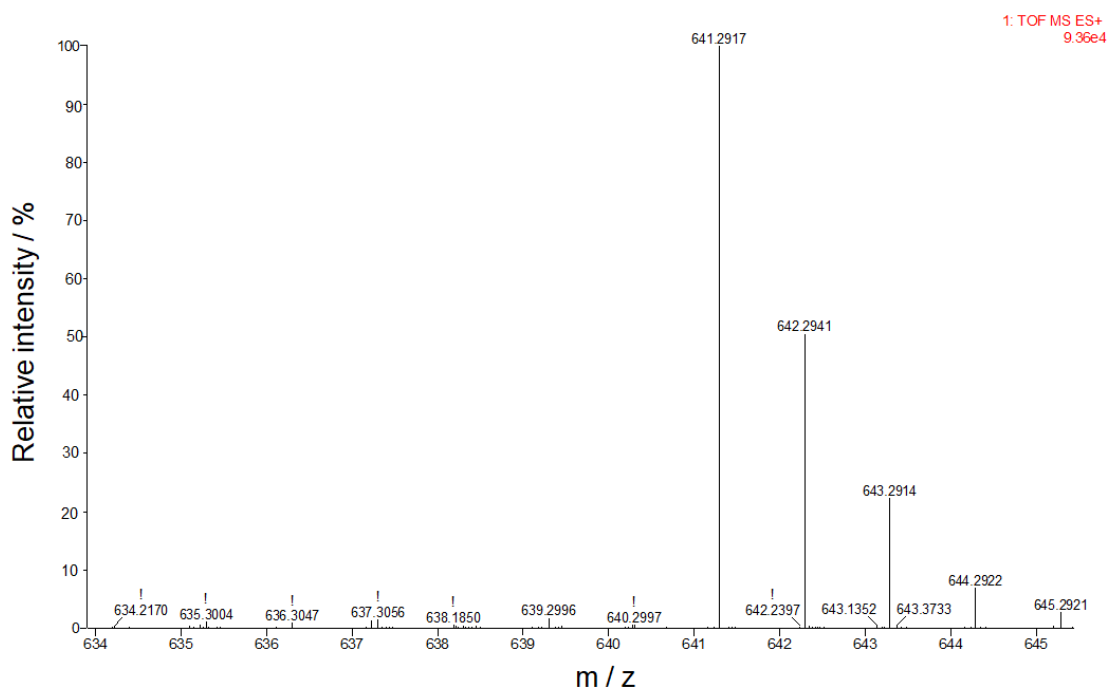

**Fig. S4.** HR-MS spectra of TIPS-Anthracene sodium-2-sulfonate

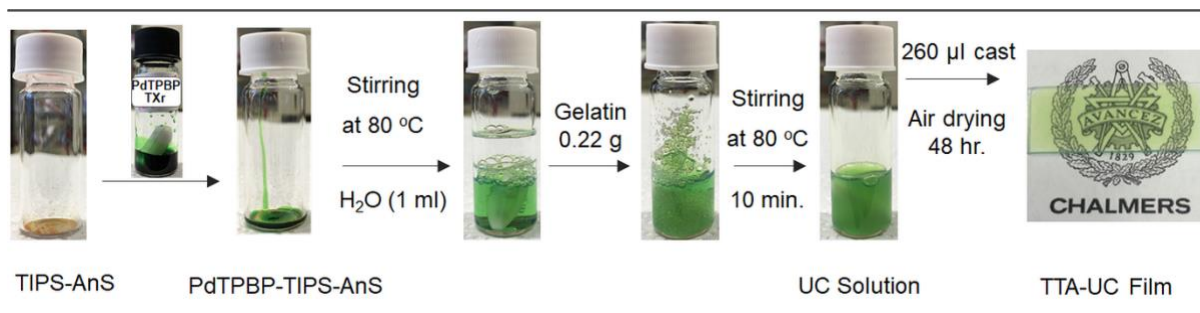

**Fig. S5.** Schematic of the preparation of G-TXr-TIPS-AnS-PdTPBP film (Sample-I).

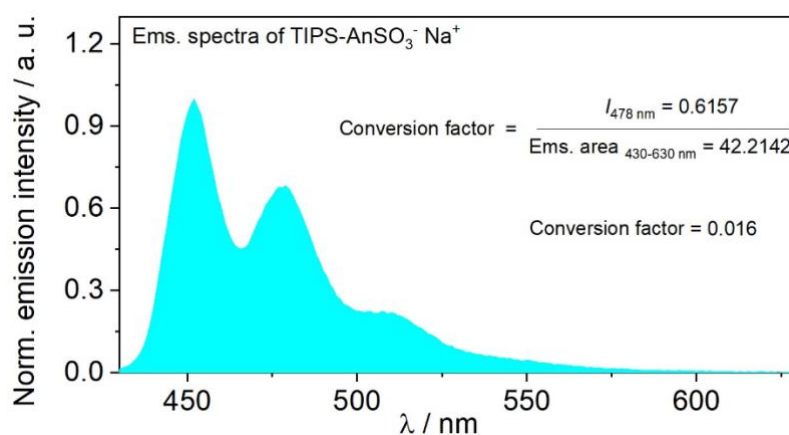

**Fig. S6.** Fluorescence emission spectra of TIPS-AnS (40 µM) in TXr liquid in air (Inset shows correction factor used for calculation of internal UC quantum yield of G-TXr-TIPS-AnS-PdTPBP films using UC emission intensities at 478 nm).

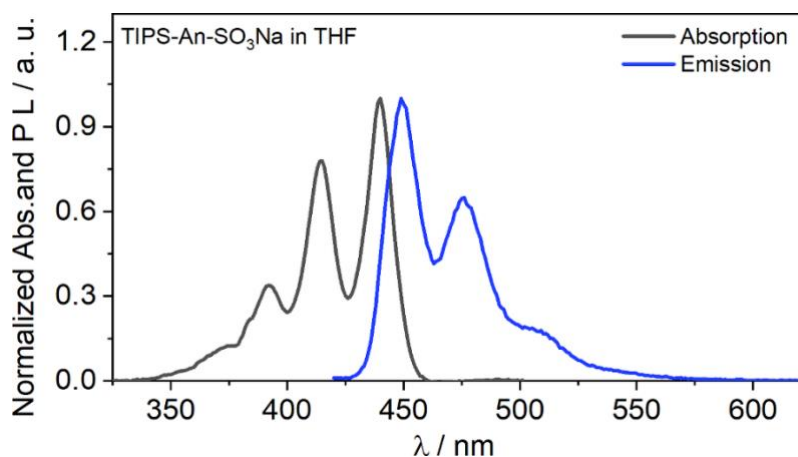

**Fig. S7.** Normalized absorption (black line) and photoluminescence (PL, blue lines) spectra of the TIPS-AnS (blue line,  $\lambda_{\text{ex}} = 415 \text{ nm}$ ) in THF. Chromophore concentrations (TIPS-AnS = 40 µM).

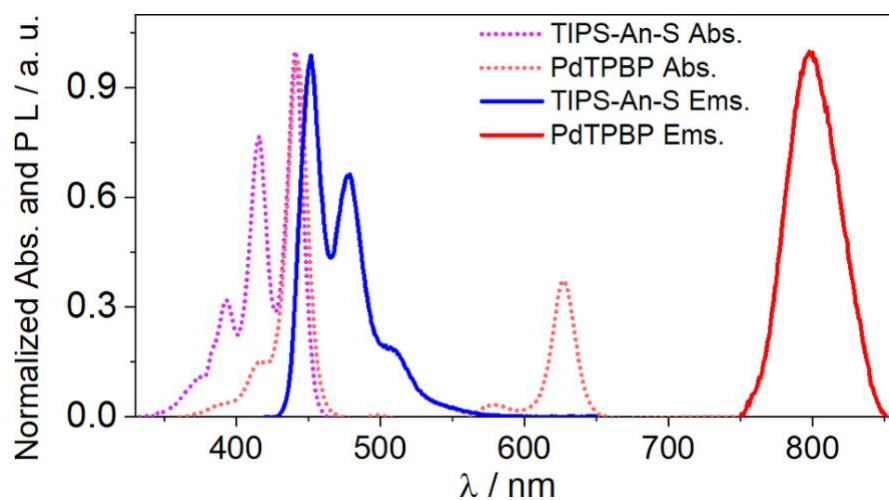

**Fig. S8.** Normalized absorption (dotted lines) and photoluminescence (PL, solid lines) spectra of the TXr-TIPS-AnS (blue line,  $\lambda_e = 415$  nm) and TXr-PdTPBP (red line,  $\lambda_{ex} = 633$  nm) in air. Chromophore concentrations TIPS-AnS = 40  $\mu$ M and PdTPBP = 5  $\mu$ M.

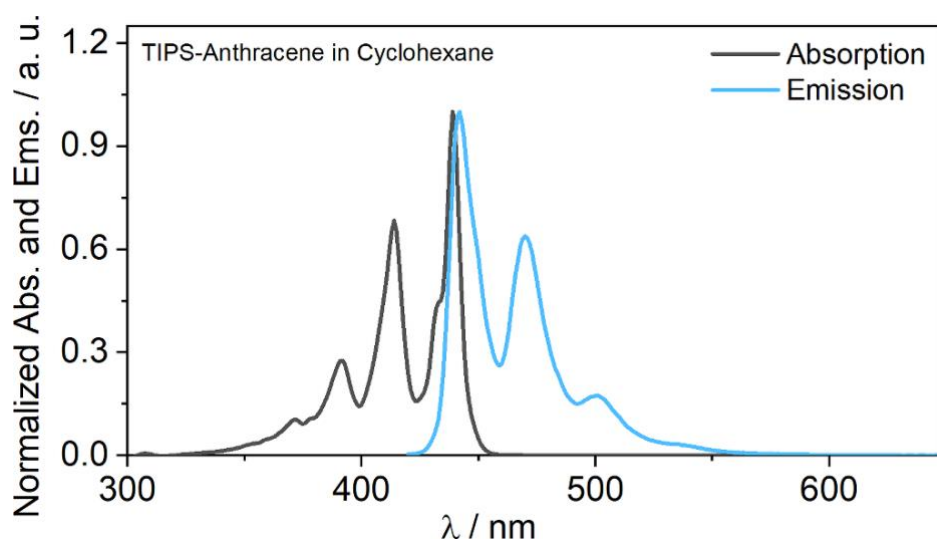

**Fig. S9.** Normalized absorption (black line) and photoluminescence (PL, blue lines) spectra of the TIPS-Anthracene (blue line,  $\lambda_{ex} = 414$  nm) in cyclohexane. Chromophore concentrations (TIPS-AnS = 40  $\mu$ M). The peaks were observed at  $\lambda_{abs} = 392$ nm, 414nm and 439 nm.  $\lambda_{ems} = 442$  nm, 476nm and 501 nm.

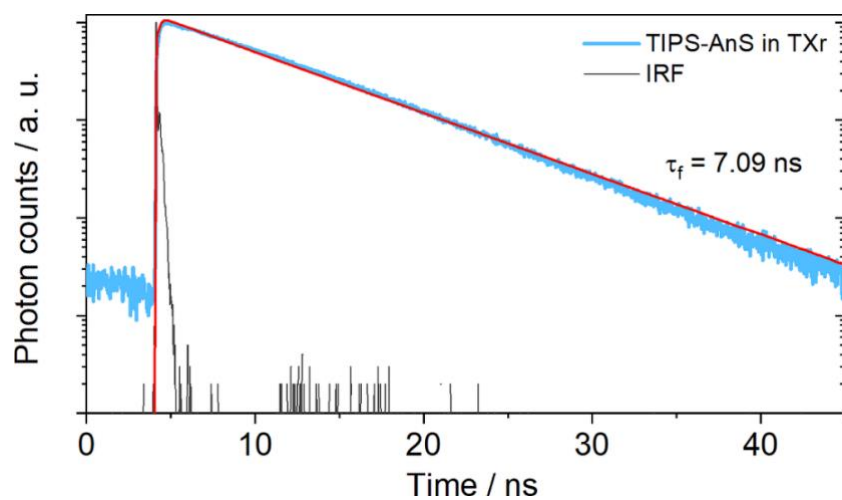

**Fig. S10.** Fluorescence decay profile of TIPS-AnS in TXr. Chromophore concentration TIPS-AnS=40  $\mu\text{M}$ .

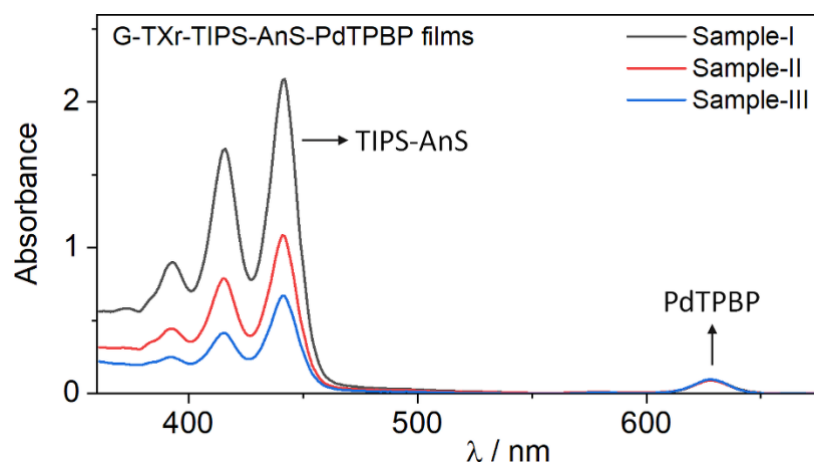

**Fig. S11.** Full absorption spectra of G-TXr-TIPS-AnS-PdTPBP films. TIPS-AnS concentrations (Sample-I = 5  $\text{mmol.kg}^{-1}$ , Sample-II = 2.5  $\text{mmol.kg}^{-1}$  and Sample-III = 1  $\text{mmol.kg}^{-1}$ ).

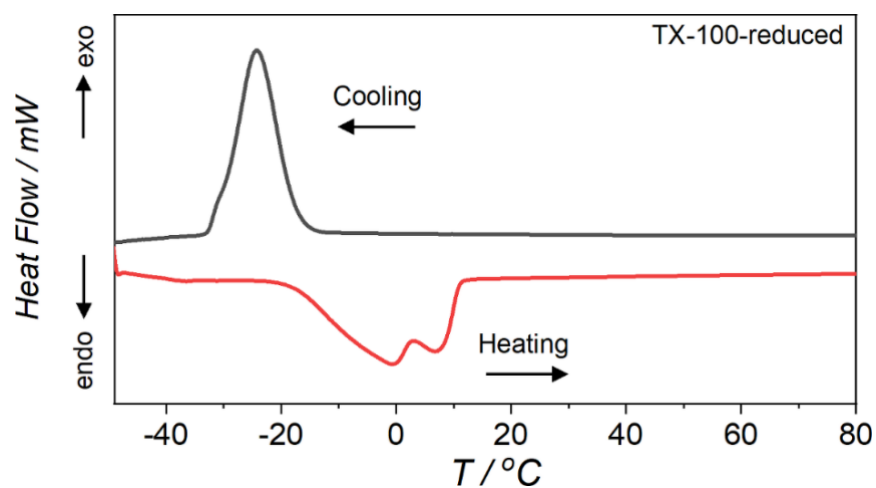

**Fig. S12.** DSC thermogram of vacuum dried TX-100-reduced. Scanning rate 10 °C min<sup>-1</sup>.

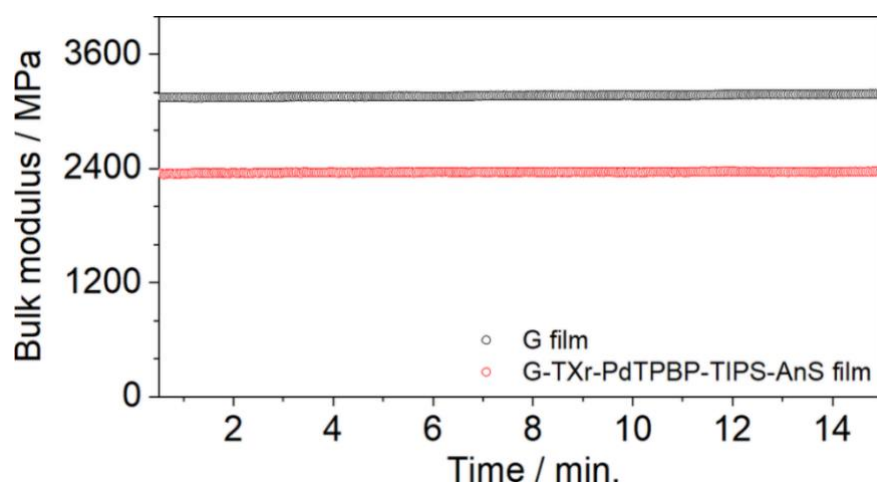

**Fig. S13.** Time sweeps dynamic mechanical analysis plots of the G film and the G-TXr-TIPS-AnS-PdTPBP film at 30 °C, a strain of 0.05 % and frequency of 1 Hz.

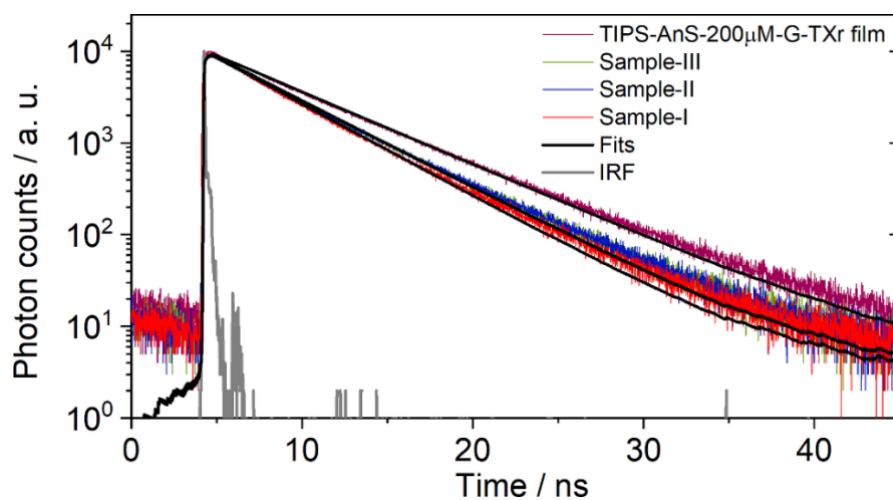

**Fig. S14.** Fluorescence decay profile of TIPS-AnS in the G-TXr-TIPS-AnS film or G-TXr-TXr-TIPS-AnS-PdTPBP films. TIPS-AnS concentrations (Sample-I =  $5 \text{ mmol kg}^{-1}$ , Sample-II =  $2.5 \text{ mmol kg}^{-1}$  and Sample-III =  $1 \text{ mmol kg}^{-1}$ ) and G-TXr-TIPS-AnS film (TIPS-AnS =  $200 \text{ } \mu\text{mol kg}^{-1}$ ).

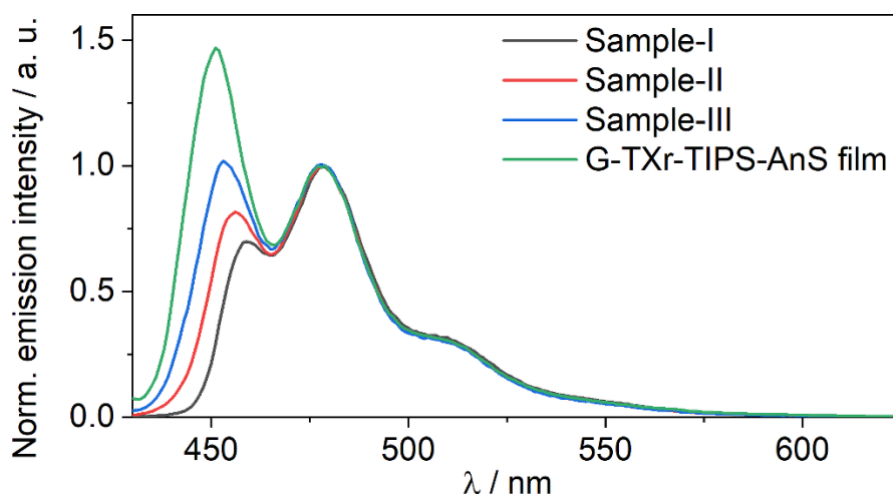

**Fig. S15.** Normalized emission spectra of TIPS-AnS in G-TXr-TIPS-AnS-PdTPBP films. TIPS-AnS concentrations (Sample-I =  $5 \text{ mmol kg}^{-1}$ , Sample-II =  $2.5 \text{ mmol kg}^{-1}$  and Sample-III =  $1 \text{ mmol kg}^{-1}$ ) and G-TXr-TIPS-AnS film (TIPS-AnS =  $200 \text{ } \mu\text{mol kg}^{-1}$ ). The spectra are normalized corresponding to the wavelength at 478 nm.

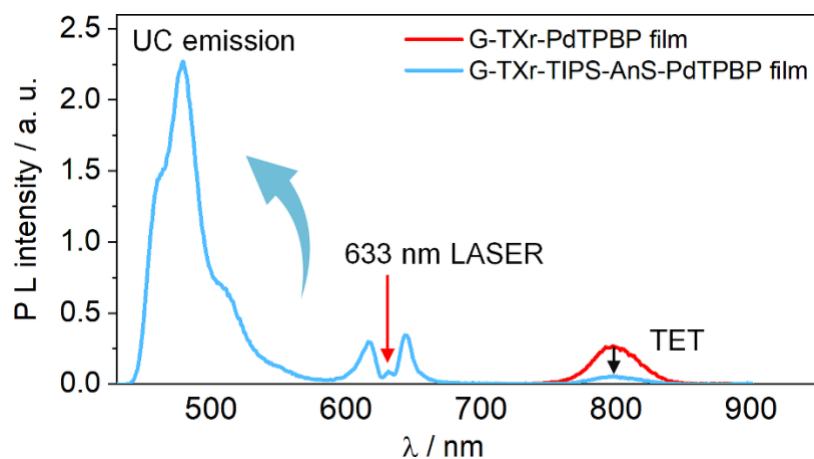

**Fig. S16.** Photoluminescence spectra of PdTPBP in the absence and presence of TIPS-AnS in sample-III.  $\lambda_{\text{ex}} = 633$  nm, excitation intensity =  $33.8 \text{ mW cm}^{-2}$ .

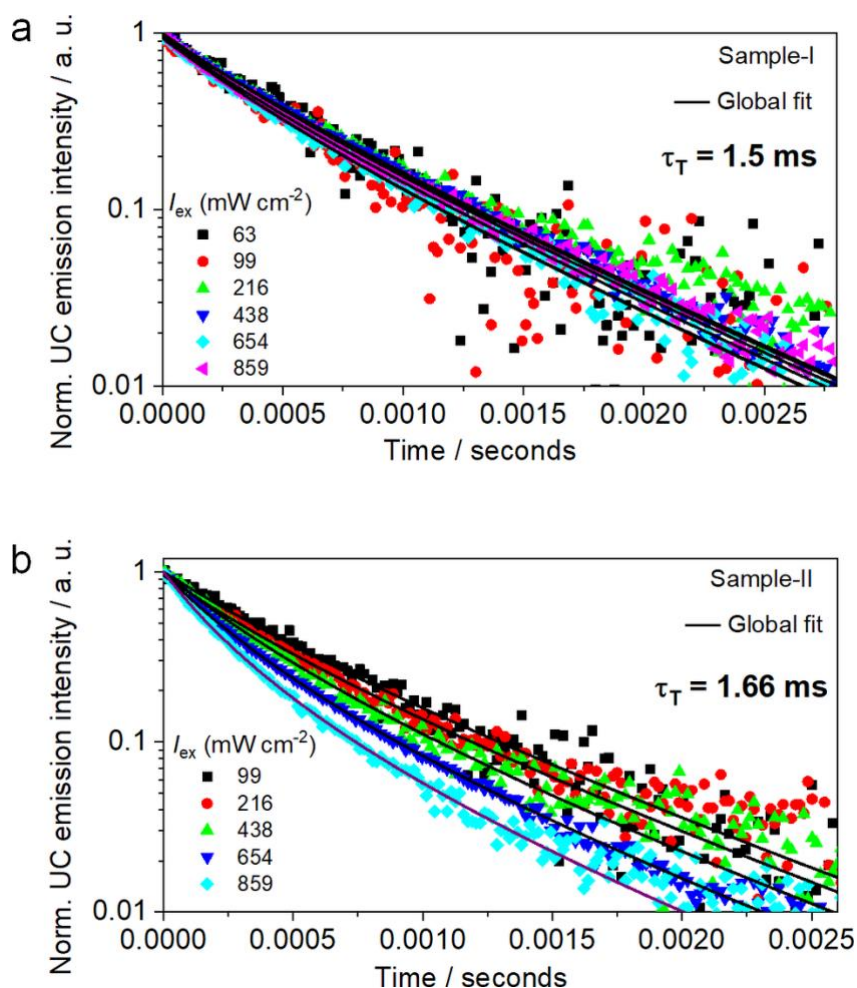

**Fig. S17.** Time resolved upconversion emission vs excitation intensity plot of G-TXr-TIPS-AnS-PdTPBP films in air. **a)** sample-I and **b)** sample-II.

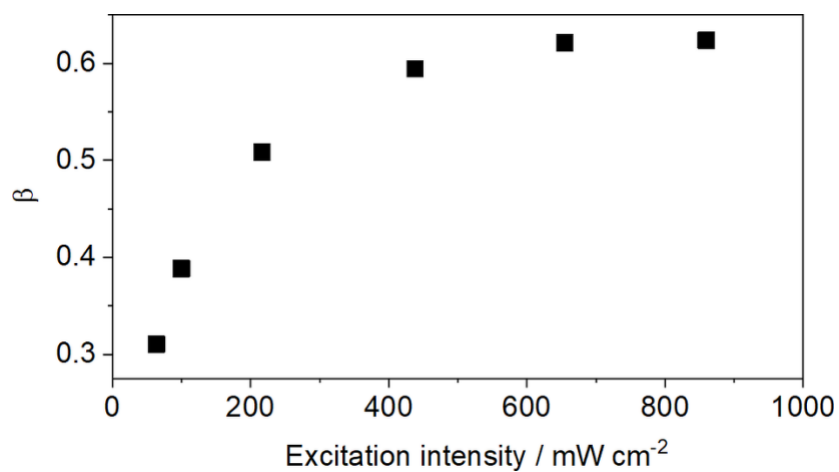

**Fig. S18.** Fitted value of  $\beta$  for the G-TXr-TIPS-AnS-PdTPBP Sample-III at various excitation intensities.

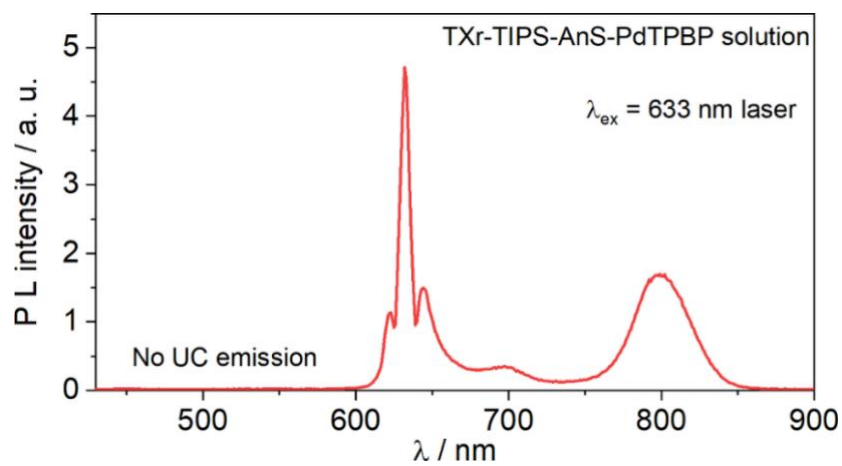

**Fig. S19.** Photoluminescence spectrum of the TXr-TIPS-AnS-PdTPBP solution at 633 nm laser (excitation intensity of  $15 \text{ W cm}^{-2}$ ) in air.

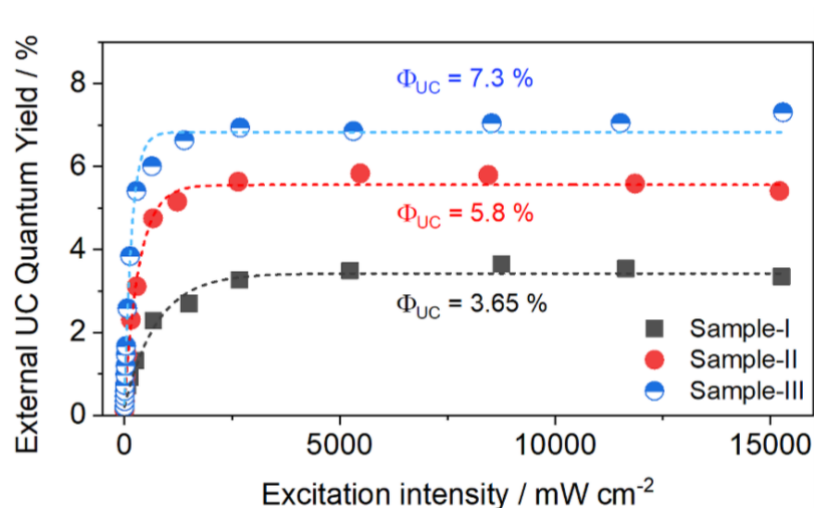

**Fig. S20.** Plot showing external UC quantum yields of G-TXr-TIPS-AnS-PdTPBP films calculated without conversion factor.

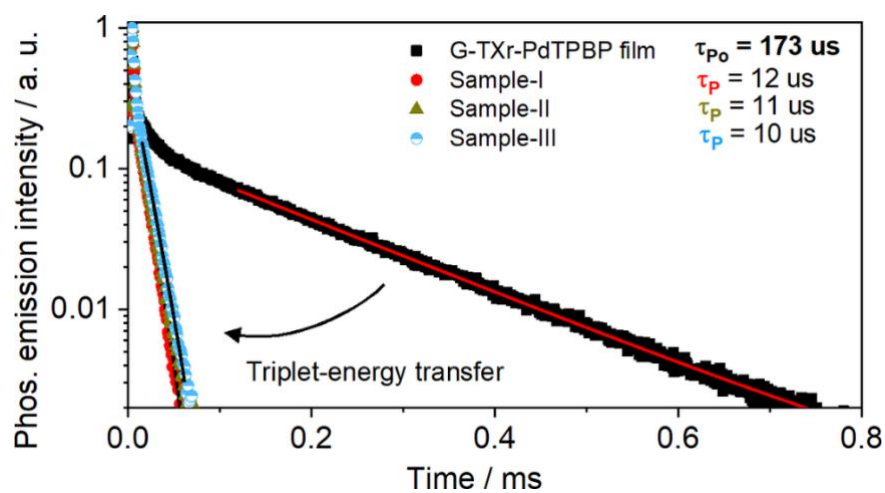

**Fig. S21.** Comparative phosphorescence decay profiles of G-TX-PdTPBP and TTA-UC film (Sample-I, Sample-II, and Sample-III).

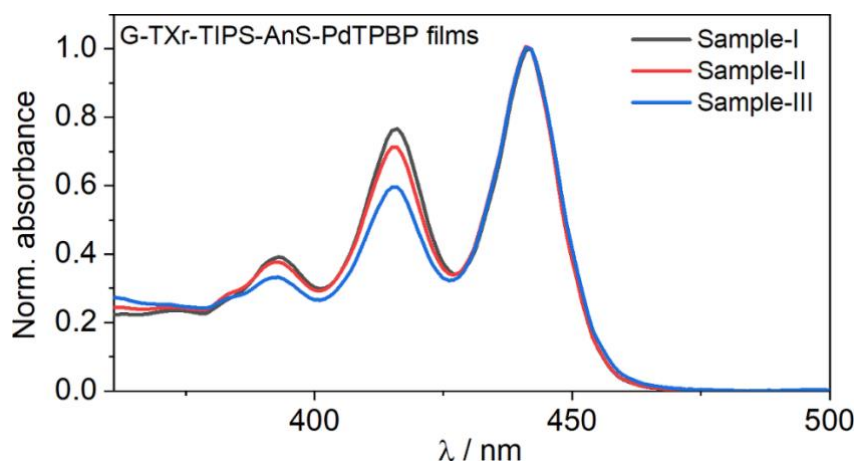

**Fig. S22.** Normalized absorption spectra of G-TXr-TIPS-AnS-PdTPBP films. TIPS-AnS concentrations (Sample-I =  $5 \text{ mmol kg}^{-1}$ , Sample-II =  $2.5 \text{ mmol.kg}^{-1}$  and Sample-III =  $1 \text{ mmol kg}^{-1}$ ).

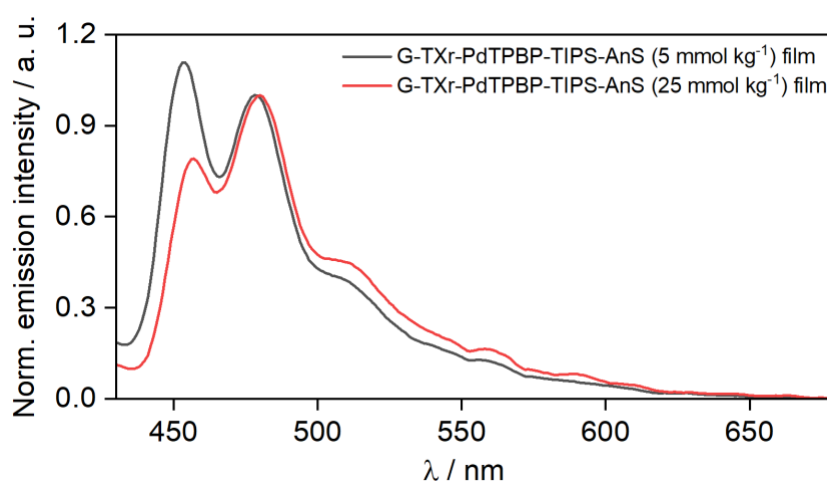

**Fig. S23.** Normalized emission spectra of G-TXr-TIPS-AnS-PdTPBP films. TIPS-AnS concentrations (TIPS-AnS =  $5 \text{ mmol kg}^{-1}$  and TIPS-AnS =  $25 \text{ mmol.kg}^{-1}$ ).

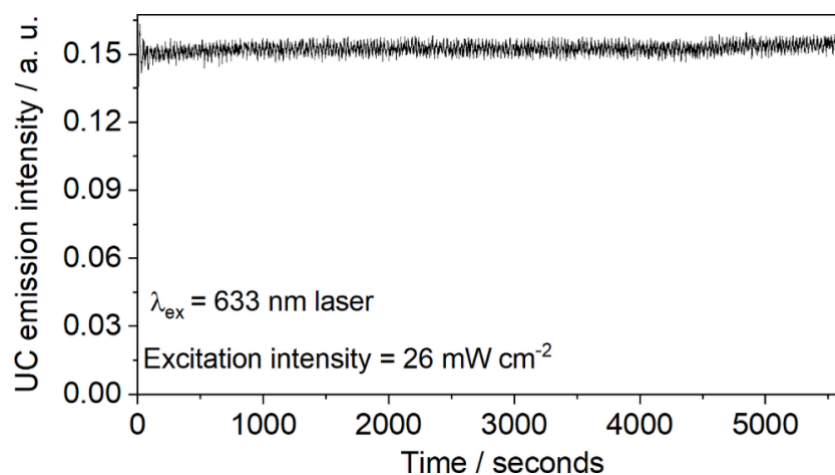

**Fig. S24.** UC emission intensity changes of the G-TXr-TIPS-AnS-PdTPBP film-I at  $\lambda_{\text{em}} = 478 \text{ nm}$  upon continuous excitation with 633 nm laser for 5600 seconds (excitation intensity of  $26 \text{ mW cm}^{-2}$ ) in air.

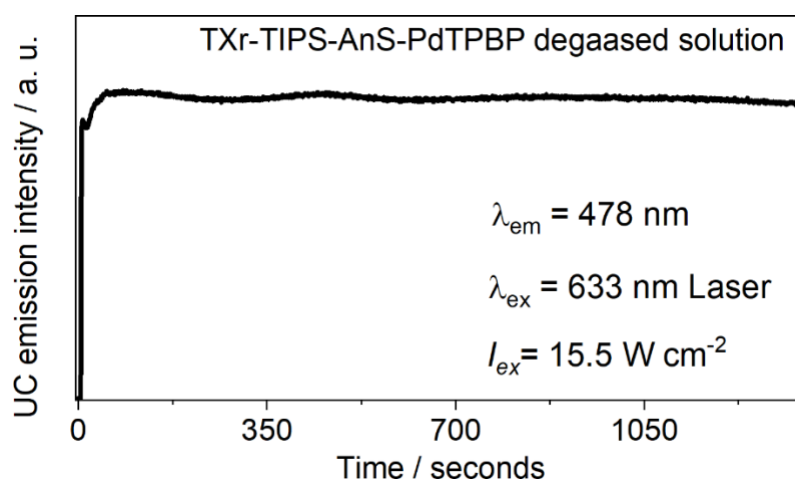

**Fig. S25.** Changes in upconversion emission intensity ( $\lambda_{\text{em}} = 478$ ) of degassed TXr-TIPS-AnS-PdTPBP solution upon 633 nm laser excitation (excitation intensity of  $15 \text{ W cm}^{-2}$ ).

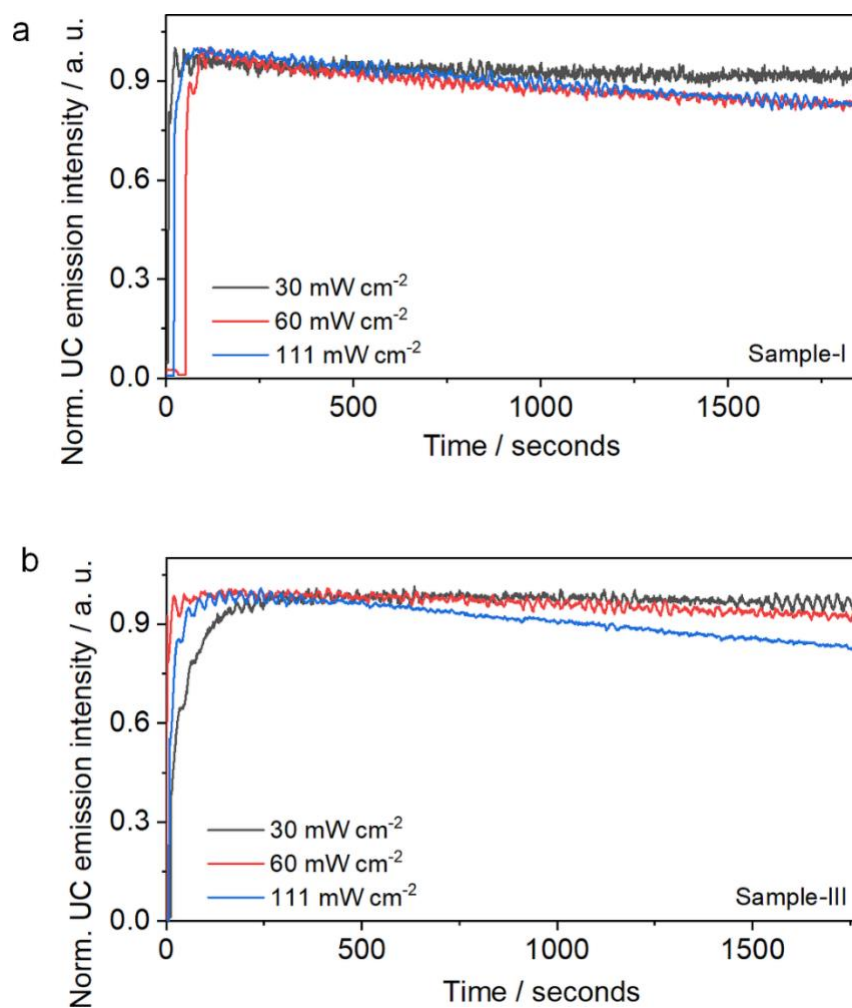

**Fig. S26.** UC emission intensity changes of the G-TXr-TIPS-AnS-PdTPBP film-I and film-III at  $\lambda_{em} = 478$  nm upon continuous excitation with 633 nm laser for 1800 seconds at varying excitation intensities in air.

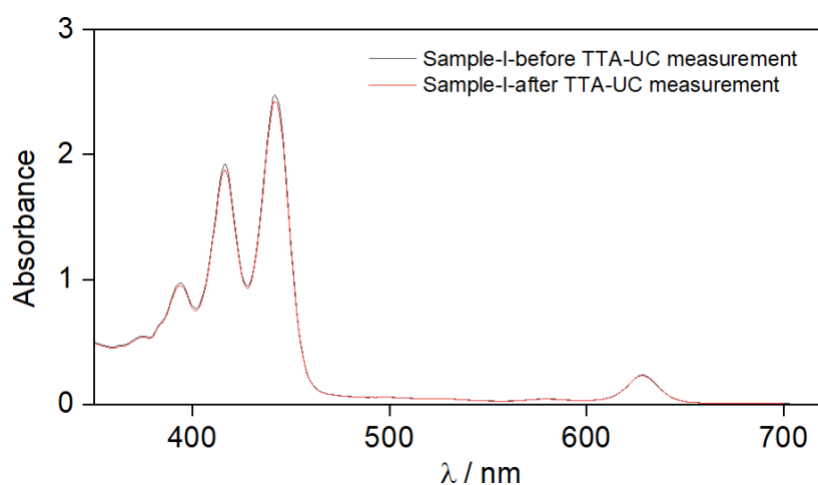

**Figure S27.** Absorption spectra of G-TXr-TIPS-AnS-PdTPBP film (Sample-I) before and after TTA-UC measurement.

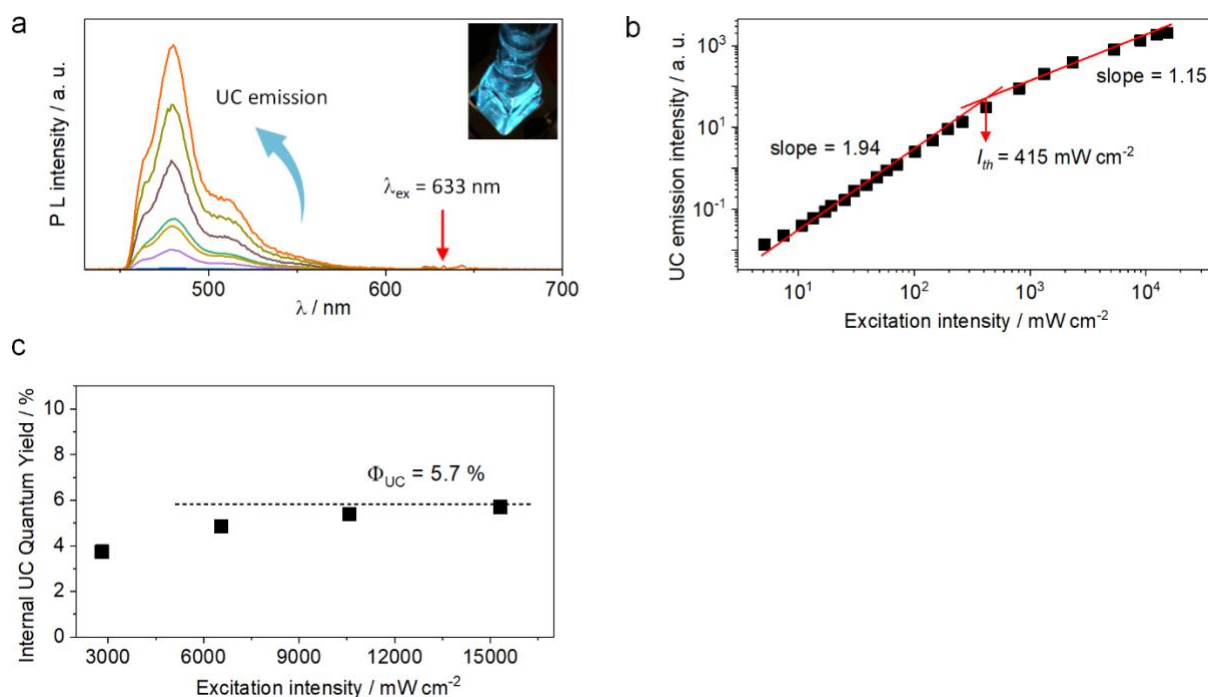

**Fig. S28. Upconversion properties of deaerated TXr-TIPS-AnS-PdTPBP solution.** a) PL spectra upon 633 nm laser excitation, inset show photograph of UC emission in the cuvette (no short pass filter used). b) Log-log plot of excitation intensity dependence of UC emission. c) Internal UC quantum yield vs. excitation intensity plot.

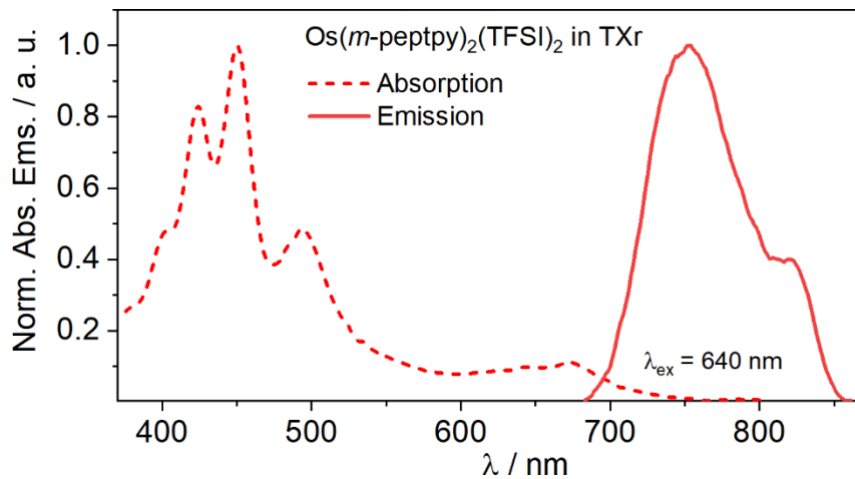

**Fig. S29.** Normalized absorption and emission spectra of  $\text{Os}(m\text{-peptpy})_2(\text{TFSI})_2$  in TXr in air ( $\lambda_{\text{ex}} = 640 \text{ nm}$ ).

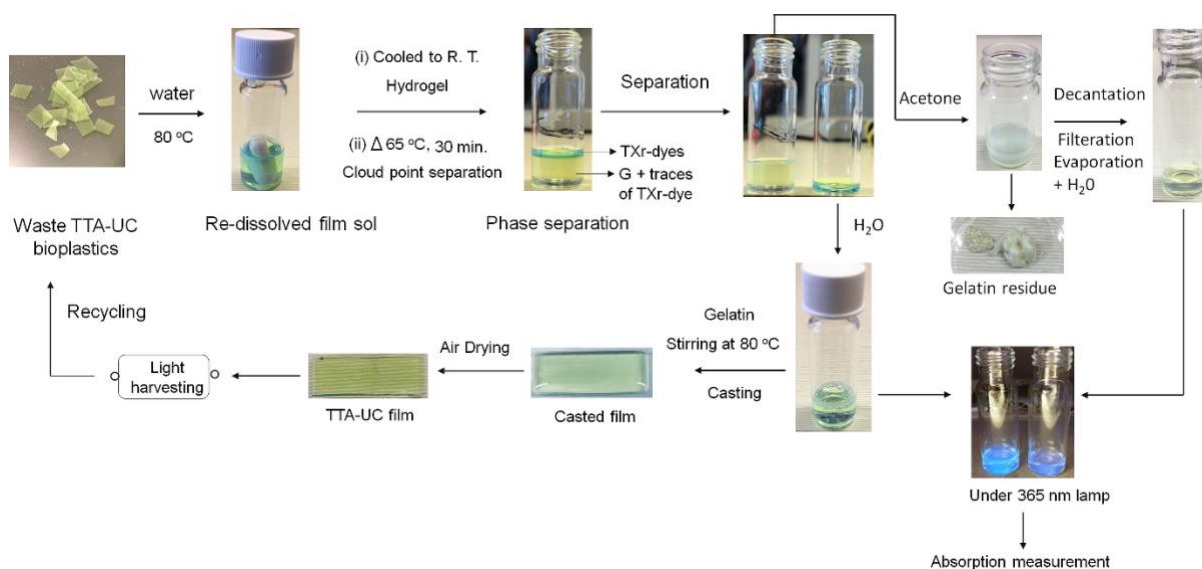

**Fig. S30.** Schematic of the recycling of G-TXr-TIPS-AnS-PdTPBP film.

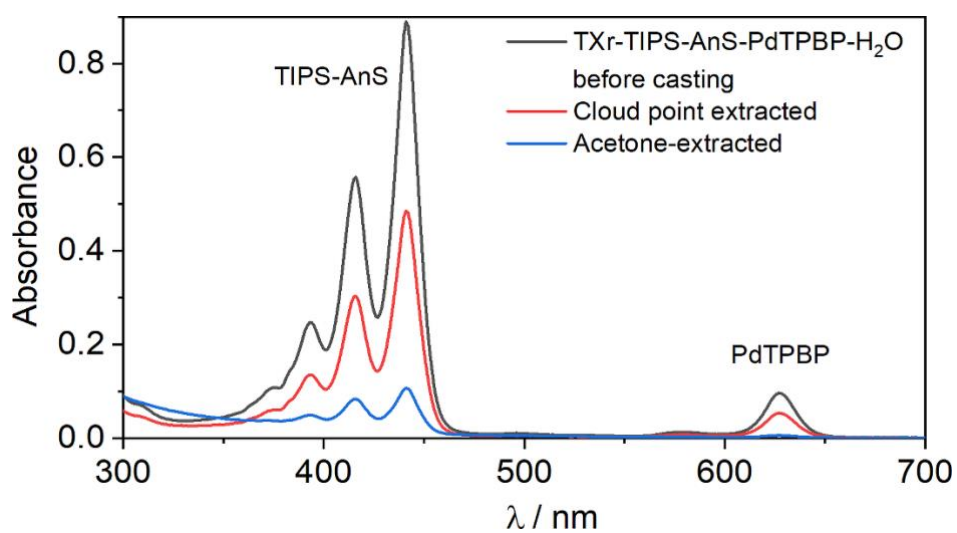

**Fig. S31.** Absorption spectra of TXr-TIPS-AnS-PdTPBP aqueous solution before casting into film and after cloud point and acetone extraction. The absorbance measurements carried out using 1 mm pathlength quartz cuvette.
